# Supplementary material
Source: publisher site journal article supplement (https://www.dovepress.com/article/537870)
Supplement: Supplementary file 1 [file Supplementary%20files_1.pdf]

**Supplementary Figure 1. ROC Curve Analyses of the Full Nomogram Model Incorporating NPS and Additional Prognostic Factors for Predicting 1-, 3-, and 5-Year Overall Survival.**

ROC curve analyses evaluating the discriminatory performance of the full nomogram model, which incorporates the NPS along with age, BMI, tumor differentiation, AJCC stage, extranodal extension (ENE), and perineural invasion (PNI), for predicting overall survival (OS) at 1 year (a), 3 years (b), and 5 years (c). Each panel includes curves for both the development and validation cohorts.

**Supplementary Table 1.** Supplementary Table 1. CONUT score.

**Supplementary Table 2.** Univariable and multivariable Cox regression analyses of prognostic factors for DFS based on the mNPS.

**Supplementary Table 3.** Univariable and multivariable Cox regression analyses of prognostic factors for DSS based on the mNPS.

**Supplementary Table 4.** Concordance index (C-index) of prognostic nomogram models incorporating mNPS or NPS for predicting OS, DFS, and DSS in development and validation cohorts.

**Supplementary Table 5.** Univariable and multivariable Cox regression analyses of prognostic factors for OS based on the conventional NPS.

**Supplementary Table 6.** Univariable and multivariable Cox regression analyses of prognostic factors for DFS based on the conventional NPS.

**Supplementary Table 7.** Univariable and multivariable Cox regression analyses of prognostic factors for DSS based on the conventional NPS.

**a**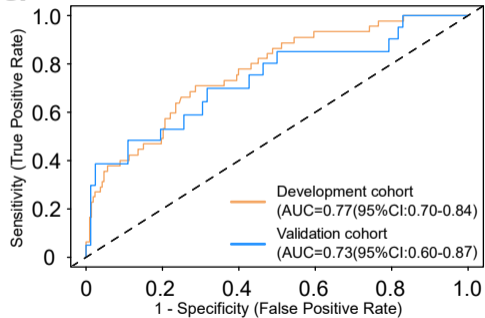**b**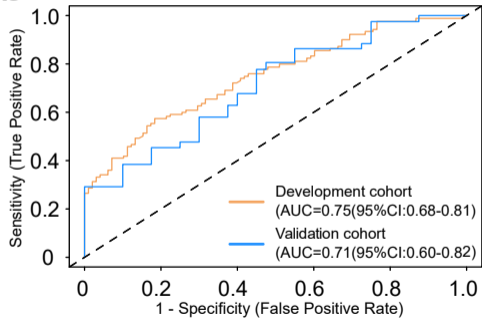**c**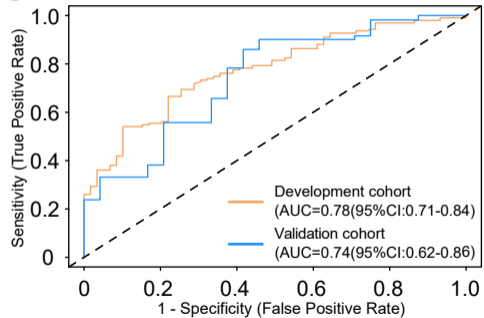

**Supplementary Table 1. CONUT score**

|                                              | Malnutrition  |               |                    |                |
|----------------------------------------------|---------------|---------------|--------------------|----------------|
|                                              | Absent<br>0-1 | Mild<br>2-4   | Moderate<br>5-8    | Severe<br>9-12 |
| Albumin, g/dl (score)                        | ≥3.5 (0)      | 3.0-3.4 (2)   | 2.5-2.9 (4)        | <2.5 (6)       |
| Total cholesterol, mg/dl (score)             | ≥180 (0)      | 140-179 (1)   | 100-139 (2)        | <100 (3)       |
| Lymphocyte count, 10 <sup>9</sup> /L (score) | ≥1.60 (0)     | 1.20-1.59 (1) | 0.80 - 1.19<br>(2) | <0.80 (3)      |

**Supplementary Table 2. Univariable and Multivariable Cox Regression Analyses of Prognostic Factors for Disease-free Survival in Patients with OSCC.**

| Characteristics <sup>a</sup> | HR(95% CI); P value      |                          |
|------------------------------|--------------------------|--------------------------|
|                              | Univariate Analysis      | Multivariable Analysis   |
| Sex                          |                          |                          |
| Female                       | Reference                |                          |
| Male                         | 0.86 (0.63 ~ 1.18);0.35  |                          |
| Age                          |                          |                          |
| <60 years                    | Reference                |                          |
| ≥60 years                    | 1.37 (0.99 ~ 1.88);0.06  |                          |
| BMI(kg/m <sup>2</sup> )      |                          |                          |
| 18.5-24                      | Reference                | Reference                |
| <18.5                        | 1.69 (1.16 ~ 2.45);0.006 | 1.33 (0.90 ~ 1.97);0.145 |
| ≥24                          | 1.40 (0.94 ~ 2.08);0.10  | 1.33 (0.88 ~ 2.01);0.172 |
| Tobacco use                  |                          |                          |
| NO                           | Reference                |                          |
| Yes                          | 1.18 (0.86 ~ 1.62);0.30  |                          |
| Alcohol use                  |                          |                          |
| NO                           | Reference                |                          |
| Yes                          | 0.82 (0.57 ~ 1.16);0.26  |                          |
| Hypertension                 |                          |                          |
| NO                           | Reference                |                          |
| Yes                          | 1.30 (0.91 ~ 1.85);0.16  |                          |
| Diabetes                     |                          |                          |
| NO                           | Reference                |                          |
| Yes                          | 1.38 (0.91 ~ 2.09);0.13  |                          |
| Location                     |                          |                          |
| Tongue                       | Reference                |                          |
| Buccal mucosa                | 1.07 (0.72 ~ 1.58);0.74  |                          |
| Gingiva                      | 0.94 (0.57 ~ 1.54);0.79  |                          |
| Lip                          | 0.69 (0.39 ~ 1.23);0.21  |                          |
| Other sites                  | 0.59 (0.30 ~ 1.14);0.12  |                          |
| Adjuvant treatment           |                          |                          |
| NO                           | Reference                | Reference                |
| Yes                          | 1.65 (1.20 ~ 2.29);0.002 | 1.02 (0.68 ~ 1.52);0.93  |
| Differentiation              |                          |                          |
| Well-differentiated          | Reference                |                          |
| Moderately differentiated    | 1.15 (0.80 ~ 1.67);0.45  |                          |
| Poorly differentiated        | 2.04 (1.32 ~ 3.15);0.001 |                          |
| AJCC stage                   |                          |                          |
| I                            | Reference                | Reference                |
| II                           | 2.00 (0.99 ~ 4.04);0.05  | 1.63 (0.80 ~ 3.34);0.18  |
| III                          | 2.72 (1.33 ~ 5.56);0.006 | 2.00 (0.93 ~ 4.33);0.08  |
| IV                           | 4.72 (2.28 ~ 9.77);<.001 | 2.51 (1.10 ~ 5.73);0.03  |
| ENE                          |                          |                          |

|                          |                          |                          |
|--------------------------|--------------------------|--------------------------|
| Negative                 | Reference                | Reference                |
| Positive                 | 3.06 (1.84 ~ 5.11);<.001 | 2.55 (1.36 ~ 4.77);0.003 |
| DOI                      |                          |                          |
| <10 mm                   | Reference                |                          |
| ≥10 mm                   | 1.65 (1.20 ~ 2.29);0.002 | 1.57 (1.06 ~ 2.33);0.02  |
| PNI                      |                          |                          |
| Negative                 | Reference                | Reference                |
| Positive                 | 1.38 (1.01 ~ 1.89);0.04  | 1.58 (1.14 ~ 2.20);0.006 |
| CONUT score <sup>c</sup> |                          |                          |
| <3                       | Reference                |                          |
| ≥3                       | 1.19 (0.66 ~ 2.15);0.56  |                          |
| mNPS                     |                          |                          |
| Group 0                  | Reference                | Reference                |
| Group 1                  | 1.93 (1.22 ~ 3.05);0.005 | 2.06 (1.26 ~ 3.34);0.004 |
| Group 2                  | 3.16 (1.96 ~ 5.08);<.001 | 3.03 (1.74 ~ 5.27);<.001 |
| SII <sup>e</sup> ,       | 1.00 (1.00 ~ 1.00);0.95  |                          |
| SIRI <sup>e</sup> ,      | 1.35 (1.11 ~ 1.65);0.003 | 1.08 (0.84 ~ 1.38);0.55  |

Abbreviations: BMI, body mass index; AJCC,American Joint Committee on Cancer;ENE,extranodal extension;DOI,Depth of invasion;PNI:Perineural invasion;SII:Systemic Immune-Inflammation Index;SIRI,Systemic inflammation response index;COUNT:Controlling nutritional status.

**Supplementary Table 3. Univariable and Multivariable Cox Regression Analyses of Prognostic Factors for Disease-Specific survival in Patients with OSCC based on modified NPS**

| Characteristics <sup>a</sup> | HR(95% CI); P value       |                         |
|------------------------------|---------------------------|-------------------------|
|                              | Univariate Analysis       | Multivariable Analysis  |
| Sex                          |                           |                         |
| Female                       | Reference                 |                         |
| Male                         | 1.04 (0.71 ~ 1.52);0.85   |                         |
| Age                          |                           |                         |
| <60 years                    | Reference                 | Reference               |
| ≥60 years                    | 1.49 (1.02 ~ 2.18);0.04   | 1.60 (1.06 ~ 2.40);0.03 |
| BMI(kg/m <sup>2</sup> )      |                           |                         |
| 18.5-24                      | Reference                 | Reference               |
| <18.5                        | 1.75 (1.13 ~ 2.72);0.01   | 1.43 (0.89 ~ 2.29);0.14 |
| ≥24                          | 1.38 (0.85 ~ 2.23);0.19   | 1.26 (0.76 ~ 2.11);0.37 |
| Tobacco use                  |                           |                         |
| NO                           | Reference                 | Reference               |
| Yes                          | 1.50 (1.03 ~ 2.18);0.04   | 1.44 (0.95 ~ 2.16);0.08 |
| Alcohol use                  |                           |                         |
| NO                           | Reference                 |                         |
| Yes                          | 1.00 (0.66 ~ 1.50);0.99   |                         |
| Hypertension                 |                           |                         |
| NO                           | Reference                 |                         |
| Yes                          | 1.30 (0.85 ~ 1.98);0.23   |                         |
| Diabetes                     |                           |                         |
| NO                           | Reference                 |                         |
| Yes                          | 1.21 (0.72 ~ 2.03);0.47   |                         |
| Location                     |                           |                         |
| Tongue                       | Reference                 | Reference               |
| Buccal mucosa                | 1.40 (0.90 ~ 2.18);0.14   | 1.59 (0.99 ~ 2.56);0.05 |
| Gingiva                      | 1.25 (0.71 ~ 2.20);0.44   | 1.43 (0.77 ~ 2.65);0.25 |
| Lip                          | 0.33 (0.12 ~ 0.91);0.03   | 0.50 (0.17 ~ 1.42);0.19 |
| Other sites                  | 0.78 (0.37 ~ 1.64);0.51   | 1.27 (0.56 ~ 2.86);0.56 |
| Adjuvant treatment           |                           |                         |
| NO                           | Reference                 | Reference               |
| Yes                          | 1.81 (1.22 ~ 2.68);0.003  | 1.27 (0.77 ~ 2.08);0.35 |
| Differentiation              |                           |                         |
| Well-differentiated          | Reference                 | Reference               |
| Moderately differentiated    | 1.11 (0.71 ~ 1.74);0.64   | 0.99 (0.61 ~ 1.61);0.97 |
| Poorly differentiated        | 2.19 (1.31 ~ 3.64);0.003  | 2.08 (1.18 ~ 3.67);0.01 |
| AJCC stage                   |                           |                         |
| I                            | Reference                 | Reference               |
| II                           | 1.40 (0.62 ~ 3.18);0.42   | 1.21 (0.52 ~ 2.83);0.66 |
| III                          | 2.35 (1.04 ~ 5.30);0.04   | 1.78 (0.73 ~ 4.39);0.21 |
| IV                           | 4.09 (1.81 ~ 9.23);<0.001 | 2.50 (0.96 ~ 6.51);0.06 |
| ENE                          |                           |                         |

|                          |                           |                          |
|--------------------------|---------------------------|--------------------------|
| Negative                 | Reference                 | Reference                |
| Positive                 | 2.64 (1.48 ~ 4.72);0.001  | 1.95 (0.95 ~ 4.03);0.07  |
| DOI                      |                           |                          |
| <10 mm                   | Reference                 | Reference                |
| ≥10 mm                   | 1.62 (1.11 ~ 2.37);0.01   | 1.18 (0.74 ~ 1.91);0.49  |
| PNI                      |                           |                          |
| Negative                 | Reference                 | Reference                |
| Positive                 | 1.81 (1.24 ~ 2.63);0.002  | 1.94 (1.29 ~ 2.93);0.001 |
| CONUT score <sup>c</sup> |                           |                          |
| <3                       | Reference                 |                          |
| ≥3                       | 0.95 (0.44 ~ 2.06);0.91   |                          |
| mNPS                     |                           |                          |
| Group 0                  | Reference                 | Reference                |
| Group 1                  | 1.67 (0.98 ~ 2.86);0.06   | 1.81 (1.01 ~ 3.26);0.048 |
| Group 2                  | 2.91 (1.68 ~ 5.05);<0.001 | 2.65 (1.36 ~ 5.18);0.004 |
| SII <sup>e</sup> ,       | 1.00 (1.00 ~ 1.00);0.74   |                          |
| SIRI <sup>e</sup> ,      | 1.35 (1.07 ~ 1.72);0.01   | 1.06 (0.77 ~ 1.46);0.71  |

Abbreviations: BMI, body mass index; AJCC,American Joint Committee on Cancer;ENE,extranodal extension;DOI,Depth of invasion;PNI:Perineural invasion;SII:Systemic Immune-Inflammation Index;SIRI,Systemic inflammation response index;COUNT:Controlling nutritional status.

**Supplementary Table 4. Concordance index (C-index) of Prognostic Nomogram Models  
Incorporating mNPS or NPS for Predicting OS, DFS, and DSS in Development and Validation Cohorts**

|                  |                    | OS                 | DFS                | DSS                |
|------------------|--------------------|--------------------|--------------------|--------------------|
| conventional NPS | development cohort | 0.70 (0.66 - 0.75) | 0.69 (0.65 - 0.73) | 0.71 (0.66 - 0.76) |
|                  | validation cohort  | 0.69 (0.61 - 0.77) | 0.68 (0.61 - 0.76) | 0.73 (0.66 - 0.80) |
| mNPS             | development cohort | 0.73 (0.69 - 0.78) | 0.72 (0.68 - 0.76) | 0.73 (0.68 - 0.79) |
|                  | validation cohort  | 0.74 (0.66 - 0.82) | 0.71 (0.64 - 0.79) | 0.76 (0.68 - 0.83) |

Abbreviations: OS, Overall survival; DFS, disease-free survival; DSS, disease-specific survival.

**Supplementary Table 5. Univariable and multivariable Cox regression analyses of prognostic factors for OS based on the conventional NPS**

| Characteristics <sup>a</sup> | HR(95% CI); P value      |                          |
|------------------------------|--------------------------|--------------------------|
|                              | Univariate Analysis      | Multivariable Analysis   |
| Sex                          |                          |                          |
| Female                       | Reference                |                          |
| Male                         | 1.01 (0.71 ~ 1.44);0.95  |                          |
| Age                          |                          |                          |
| <60 years                    | Reference                | Reference                |
| ≥60 years                    | 1.52 (1.07 ~ 2.15);0.02  | 1.64 (1.13 ~ 2.40);0.01  |
| BMI(kg/m <sup>2</sup> )      |                          |                          |
| 18.5-24                      | Reference                | Reference                |
| <18.5                        | 2.19 (1.47 ~ 3.27);<.001 | 1.94 (1.26 ~ 2.97);0.002 |
| ≥24                          | 1.74 (1.13 ~ 2.69);0.01  | 1.60 (1.01 ~ 2.53);0.04  |
| Tobacco use                  |                          |                          |
| NO                           | Reference                | Reference                |
| Yes                          | 1.46 (1.04 ~ 2.06);0.03  | 1.22 (0.84 ~ 1.76);0.30  |
| Alcohol use                  |                          |                          |
| NO                           | Reference                |                          |
| Yes                          | 0.99 (0.68 ~ 1.44);0.94  |                          |
| Hypertension                 |                          |                          |
| NO                           | Reference                |                          |
| Yes                          | 1.32 (0.89 ~ 1.94);0.17  |                          |
| Diabetes                     |                          |                          |
| NO                           | Reference                |                          |
| Yes                          | 1.42 (0.91 ~ 2.23);0.13  |                          |
| Location                     |                          |                          |
| Tongue                       | Reference                |                          |
| Buccal mucosa                | 1.31 (0.86 ~ 2.00);0.21  |                          |
| Gingiva                      | 1.30 (0.77 ~ 2.19);0.32  |                          |
| Lip                          | 0.87 (0.47 ~ 1.63);0.66  |                          |
| Other sites                  | 0.77 (0.38 ~ 1.55);0.46  |                          |
| Adjuvant treatment           |                          |                          |
| NO                           | Reference                | Reference                |
| Yes                          | 1.48 (1.04 ~ 2.10);0.03  | 1.28 (0.83 ~ 1.97);0.27  |
| Differentiation              |                          |                          |
| Well-differentiated          | Reference                | Reference                |
| Moderately differentiated    | 1.22 (0.82 ~ 1.84);0.33  | 1.38 (0.90 ~ 2.13);0.14  |
| Poorly differentiated        | 2.41 (1.52 ~ 3.83);<.001 | 2.41 (1.48 ~ 3.93);<.001 |
| AJCC stage                   |                          |                          |
| I                            | Reference                | Reference                |
| II                           | 1.75 (0.83 ~ 3.71);0.14  | 1.61 (0.74 ~ 3.48);0.23  |
| III                          | 2.37 (1.11 ~ 5.06);0.03  | 2.03 (0.90 ~ 4.56);0.09  |
| IV                           | 3.74 (1.73 ~ 8.06);<.001 | 2.93 (1.27 ~ 6.73);0.01  |
| ENE                          |                          |                          |

|                          |                          |                          |
|--------------------------|--------------------------|--------------------------|
| Negative                 | Reference                | Reference                |
| Positive                 | 2.21 (1.24 ~ 3.93);0.007 | 1.69 (0.86 ~ 3.32);0.13  |
| DOI                      |                          |                          |
| <10 mm                   | Reference                |                          |
| ≥10 mm                   | 1.26 (0.88 ~ 1.80);0.20  |                          |
| PNI                      |                          |                          |
| Negative                 | Reference                |                          |
| Positive                 | 1.59 (1.12 ~ 2.24);0.009 |                          |
| CONUT score <sup>c</sup> |                          |                          |
| <3                       | Reference                |                          |
| ≥3                       | 0.90 (0.44 ~ 1.84);0.77  |                          |
| NPS                      |                          |                          |
| Group 0                  | Reference                | Reference                |
| Group 1                  | 2.18 (1.33 ~ 3.57);0.002 | 2.03 (1.21 ~ 3.43);0.008 |
| Group 2                  | 3.30 (1.87 ~ 5.83);<.001 | 2.05 (1.04 ~ 4.05);0.04  |
| SII <sup>c</sup> ,       | 1.00 (1.00 ~ 1.00);0.78  | ;                        |
| SIRI <sup>c</sup> ,      | 1.46 (1.18 ~ 1.80);<.001 | 1.21 (0.92 ~ 1.58);0.17  |

Abbreviations:HR:hazard ratio; BMI, body mass index; AJCC,American Joint Committee on Cancer;SII:Systemic Immune-Inflammation Index;SIRI: Systemic Inflammation Response Index;PNI:Prognostic Nutritional Index.

<sup>c</sup>The SII was computed as Platelet count×Neutrophil count/Lymphocyte count.

<sup>d</sup>The SIRI was derived using

<sup>e</sup>The PNI was calculated as  $10 \times \text{Serum albumin (g/dL)} + 0.005 \times \text{Total lymphocyte count (cells/mm}^3)$

**Supplementary Table 6. Univariable and Multivariable Cox Regression Analyses of Prognostic Factors for Disease-free Survival in Patients with OSCC based on original NPS**

| Characteristics <sup>a</sup> | HR(95% CI); P value       |                         |
|------------------------------|---------------------------|-------------------------|
|                              | Univariate Analysis       | Multivariable Analysis  |
| Sex                          |                           |                         |
| Female                       | Reference                 |                         |
| Male                         | 0.86 (0.63 ~ 1.18);0.35   |                         |
| Age                          |                           |                         |
| <60 years                    | Reference                 |                         |
| ≥60 years                    | 1.37 (0.99 ~ 1.88);0.06   |                         |
| BMI(kg/m <sup>2</sup> )      |                           |                         |
| 18.5-24                      | Reference                 | Reference               |
| <18.5                        | 1.69 (1.16 ~ 2.45);0.006  | 1.40 (0.95 ~ 2.06);0.09 |
| ≥24                          | 1.40 (0.94 ~ 2.08);0.10   | 1.34 (0.89 ~ 2.03);0.16 |
| Tobacco use                  |                           |                         |
| NO                           | Reference                 |                         |
| Yes                          | 1.18 (0.86 ~ 1.62);0.30   |                         |
| Alcohol use                  |                           |                         |
| NO                           | Reference                 |                         |
| Yes                          | 0.82 (0.57 ~ 1.16);0.26   |                         |
| Hypertension                 |                           |                         |
| NO                           | Reference                 |                         |
| Yes                          | 1.30 (0.91 ~ 1.85);0.16   |                         |
| Diabetes                     |                           |                         |
| NO                           | Reference                 |                         |
| Yes                          | 1.38 (0.91 ~ 2.09);0.13   |                         |
| Location                     |                           |                         |
| Tongue                       | Reference                 |                         |
| Buccal mucosa                | 1.07 (0.72 ~ 1.58);0.74   |                         |
| Gingiva                      | 0.94 (0.57 ~ 1.54);0.79   |                         |
| Lip                          | 0.69 (0.39 ~ 1.23);0.21   |                         |
| Other sites                  | 0.59 (0.30 ~ 1.14);0.12   |                         |
| Adjuvant treatment           |                           |                         |
| NO                           | Reference                 | Reference               |
| Yes                          | 1.65 (1.20 ~ 2.29);0.002  | 1.05 (0.70 ~ 1.56);0.82 |
| Differentiation              |                           |                         |
| Well-differentiated          | Reference                 |                         |
| Moderately differentiated    | 1.15 (0.80 ~ 1.67);0.45   |                         |
| Poorly differentiated        | 2.04 (1.32 ~ 3.15);0.001  |                         |
| AJCC stage                   |                           |                         |
| I                            | Reference                 | Reference               |
| II                           | 2.00 (0.99 ~ 4.04);0.05   | 1.70 (0.83 ~ 3.49);0.15 |
| III                          | 2.72 (1.33 ~ 5.56);0.006  | 2.10 (0.97 ~ 4.53);0.06 |
| IV                           | 4.72 (2.28 ~ 9.77);<0.001 | 2.79 (1.23 ~ 6.35);0.01 |
| ENE                          |                           |                         |

|                          |                           |                          |
|--------------------------|---------------------------|--------------------------|
| Negative                 | Reference                 | Reference                |
| Positive                 | 3.06 (1.84 ~ 5.11);<0.001 | 2.43 (1.30 ~ 4.52);0.005 |
| DOI                      |                           |                          |
| <10 mm                   | Reference                 |                          |
| ≥10 mm                   | 1.65 (1.20 ~ 2.29);0.002  | 1.49 (1.01 ~ 2.20);0.05  |
| PNI                      |                           |                          |
| Negative                 | Reference                 | Reference                |
| Positive                 | 1.38 (1.01 ~ 1.89);0.04   | 1.52 (1.09 ~ 2.11);0.01  |
| CONUT score <sup>c</sup> |                           |                          |
| <3                       | Reference                 |                          |
| ≥3                       | 1.19 (0.66 ~ 2.15);0.56   |                          |
| NPS                      |                           |                          |
| Group 0                  | Reference                 | Reference                |
| Group 1                  | 1.76 (1.16 ~ 2.68);0.008  | 1.75 (1.12 ~ 2.74);0.01  |
| Group 2                  | 2.49 (1.51 ~ 4.10);<0.001 | 1.89 (1.05 ~ 3.41);0.03  |
| SII <sup>e</sup> ,       | 1.00 (1.00 ~ 1.00);0.95   |                          |
| SIRI <sup>e</sup> ,      | 1.35 (1.11 ~ 1.65);0.003  | 1.19 (0.93 ~ 1.52);0.16  |

Abbreviations: BMI, body mass index; AJCC,American Joint Committee on Cancer;ENE,extranodal extension;DOI,Depth of invasion;PNI:Perineural invasion;SII:Systemic Immune-Inflammation Index;SIRI,Systemic inflammation response index;COUNT:Controlling nutritional status.

**Supplementary Table 7. Univariable and Multivariable Cox Regression Analyses of Prognostic Factors for Disease-Specific survival in Patients with OSCC based on original NPS**

| Characteristics <sup>a</sup> | HR(95% CI); P value       |                         |
|------------------------------|---------------------------|-------------------------|
|                              | Univariate Analysis       | Multivariable Analysis  |
| Sex                          |                           |                         |
| Female                       | Reference                 |                         |
| Male                         | 1.04 (0.71 ~ 1.52);0.85   |                         |
| Age                          |                           |                         |
| <60 years                    | Reference                 | Reference               |
| ≥60 years                    | 1.49 (1.02 ~ 2.18);0.04   | 1.64 (1.08 ~ 2.47);0.02 |
| BMI(kg/m <sup>2</sup> )      |                           |                         |
| 18.5-24                      | Reference                 | Reference               |
| <18.5                        | 1.75 (1.13 ~ 2.72);0.01   | 1.43 (0.89 ~ 2.29);0.14 |
| ≥24                          | 1.38 (0.85 ~ 2.23);0.19   | 1.26 (0.76 ~ 2.11);0.37 |
| Tobacco use                  |                           |                         |
| NO                           | Reference                 | Reference               |
| Yes                          | 1.50 (1.03 ~ 2.18);0.04   | 1.41 (0.94 ~ 2.12);0.10 |
| Alcohol use                  |                           |                         |
| NO                           | Reference                 |                         |
| Yes                          | 1.00 (0.66 ~ 1.50);0.99   |                         |
| Hypertension                 |                           |                         |
| NO                           | Reference                 |                         |
| Yes                          | 1.30 (0.85 ~ 1.98);0.23   |                         |
| Diabetes                     |                           |                         |
| NO                           | Reference                 |                         |
| Yes                          | 1.21 (0.72 ~ 2.03);0.47   |                         |
| Location                     |                           |                         |
| Tongue                       | Reference                 | Reference               |
| Buccal mucosa                | 1.40 (0.90 ~ 2.18);0.14   | 1.54 (0.96 ~ 2.48);0.08 |
| Gingiva                      | 1.25 (0.71 ~ 2.20);0.44   | 1.29 (0.69 ~ 2.39);0.42 |
| Lip                          | 0.33 (0.12 ~ 0.91);0.03   | 0.50 (0.17 ~ 1.44);0.20 |
| Other sites                  | 0.78 (0.37 ~ 1.64);0.51   | 1.07 (0.48 ~ 2.42);0.86 |
| Adjuvant treatment           |                           |                         |
| NO                           | Reference                 | Reference               |
| Yes                          | 1.81 (1.22 ~ 2.68);0.003  | 1.30 (0.78 ~ 2.16);0.31 |
| Differentiation              |                           |                         |
| Well-differentiated          | Reference                 | Reference               |
| Moderately differentiated    | 1.11 (0.71 ~ 1.74);0.64   | 1.10 (0.67 ~ 1.79);0.71 |
| Poorly differentiated        | 2.19 (1.31 ~ 3.64);0.003  | 2.12 (1.20 ~ 3.76);0.01 |
| AJCC stage                   |                           |                         |
| I                            | Reference                 | Reference               |
| II                           | 1.40 (0.62 ~ 3.18);0.42   | 1.23 (0.52 ~ 2.88);0.64 |
| III                          | 2.35 (1.04 ~ 5.30);0.04   | 1.83 (0.75 ~ 4.48);0.19 |
| IV                           | 4.09 (1.81 ~ 9.23);<0.001 | 2.69 (1.04 ~ 6.96);0.04 |
| ENE                          |                           |                         |

|                          |                           |                          |
|--------------------------|---------------------------|--------------------------|
| Negative                 | Reference                 | Reference                |
| Positive                 | 2.64 (1.48 ~ 4.72);0.001  | 1.83 (0.89 ~ 3.75);0.10  |
| DOI                      |                           |                          |
| <10 mm                   | Reference                 | Reference                |
| ≥10 mm                   | 1.62 (1.11 ~ 2.37);0.01   | 1.16 (0.72 ~ 1.87);0.54  |
| PNI                      |                           |                          |
| Negative                 | Reference                 | Reference                |
| Positive                 | 1.81 (1.24 ~ 2.63);0.002  | 1.84 (1.21 ~ 2.79);0.004 |
| CONUT score <sup>c</sup> |                           |                          |
| <3                       | Reference                 |                          |
| ≥3                       | 0.95 (0.44 ~ 2.06);0.91   |                          |
| NPS                      |                           |                          |
| Group 0                  | Reference                 | Reference                |
| Group 1                  | 2.13 (1.25 ~ 3.63);0.006  | 2.01 (1.13 ~ 3.59);0.02  |
| Group 2                  | 3.21 (1.73 ~ 5.95);<0.001 | 2.19 (1.03 ~ 4.64);0.04  |
| SII <sup>e</sup> ,       | 1.00 (1.00 ~ 1.00);0.74   |                          |
| SIRI <sup>e</sup> ,      | 1.35 (1.07 ~ 1.72);0.01   | 1.12 (0.82 ~ 1.55);0.48  |

Abbreviations: BMI, body mass index; AJCC,American Joint Committee on Cancer;ENE,extranodal extension;DOI,Depth of invasion;PNI:Perineural invasion;SII:Systemic Immune-Inflammation Index;SIRI,Systemic inflammation response index;COUNT:Controlling nutritional status.
